# Supplementary material for: Chemical Composition and Biological Activities of Oregano Essential Oil and Its Fractions Obtained by Vacuum Distillation
Source: PubMed Central journal article supplement (PMC6571842; doi:10.3390/molecules24101904), 2019-05-17
Supplement: molecules-24-01904-s001.pdf [file molecules-24-01904-s001.pdf]

## Supplementary Material

**Table 1S.** Calculation of the Kovats index of the compounds identified in the GC-MS.

| <b>Compound</b>     | <b>Retention time</b> | <b>Retention time of decane trx = 10</b> | <b>Retention time of dodecane trx = 12</b> | <b>Kovats index calculated</b> |
|---------------------|-----------------------|------------------------------------------|--------------------------------------------|--------------------------------|
| $\alpha$ -thujene   | 3.752                 | 4.55                                     | 7.31                                       | 919                            |
| $\alpha$ -pinene    | 3.856                 | 4.55                                     | 7.31                                       | 930                            |
| $\beta$ -myrcene    | 4.488                 | 4.55                                     | 7.31                                       | 994                            |
| Phellandrene        | 4.717                 | 4.55                                     | 7.31                                       | 1015                           |
| $\alpha$ -terpinene | 4.877                 | 4.55                                     | 7.31                                       | 1029                           |
| <i>o</i> -cymene    | 4.985                 | 4.55                                     | 7.31                                       | 1039                           |
| Limonene            | 5.042                 | 4.55                                     | 7.31                                       | 1043                           |
| 1,8-cineole         | 5.089                 | 4.55                                     | 7.31                                       | 1047                           |
| $\gamma$ -terpinene | 5.444                 | 4.55                                     | 7.31                                       | 1076                           |
| Thymol              | 8.661                 | 4.55                                     | 7.31                                       | 1272                           |
| Carvacrol           | 8.804                 | 4.55                                     | 7.31                                       | 1278                           |
| Trans-caryophyllene | 10.514                | 4.55                                     | 7.31                                       | 1353                           |
| $\alpha$ -humelene  | 10.946                | 4.55                                     | 7.31                                       | 1370                           |

**Table 2S.** Extraction method: Principal Components Analysis. Total variance explained.

| Component | Initial eigenvalues     |                         |                        | Sums of saturations to the square of the extraction |                        |                        | Sum of the saturations to the square of the rotation |                        |                        |
|-----------|-------------------------|-------------------------|------------------------|-----------------------------------------------------|------------------------|------------------------|------------------------------------------------------|------------------------|------------------------|
|           | Total                   | Percentage of variance  | Percentage accumulated | Total                                               | Percentage of variance | Percentage accumulated | Total                                                | Percentage of variance | Percentage accumulated |
| 1         | 14.72                   | 77.45                   | 77.45                  | 14.72                                               | 77.45                  | 77.45                  | 10.17                                                | 53.53                  | 53.53                  |
| 2         | 2.66                    | 14.01                   | 91.46                  | 2.66                                                | 14.01                  | 91.46                  | 7.21                                                 | 37.93                  | 91.46                  |
| 3         | 0.82                    | 4.31                    | 95.77                  |                                                     |                        |                        |                                                      |                        |                        |
| 4         | 0.48                    | 2.52                    | 98.29                  |                                                     |                        |                        |                                                      |                        |                        |
| 5         | 0.33                    | 1.72                    | 100.00                 |                                                     |                        |                        |                                                      |                        |                        |
| 6         | $5.91 \times 10^{-16}$  | $3.11 \times 10^{-15}$  | 100.00                 |                                                     |                        |                        |                                                      |                        |                        |
| 7         | $4.08 \times 10^{-16}$  | $2.18 \times 10^{-15}$  | 100.00                 |                                                     |                        |                        |                                                      |                        |                        |
| 8         | $3.54 \times 10^{-16}$  | $1.86 \times 10^{-15}$  | 100.00                 |                                                     |                        |                        |                                                      |                        |                        |
| 9         | $2.58 \times 10^{-16}$  | $1.36 \times 10^{-15}$  | 100.00                 |                                                     |                        |                        |                                                      |                        |                        |
| 10        | $2.35 \times 10^{-16}$  | $1.24 \times 10^{-15}$  | 100.00                 |                                                     |                        |                        |                                                      |                        |                        |
| 11        | $1.91 \times 10^{-16}$  | $1.00 \times 10^{-15}$  | 100.00                 |                                                     |                        |                        |                                                      |                        |                        |
| 12        | $2.99 \times 10^{-17}$  | $1.57 \times 10^{-16}$  | 100.00                 |                                                     |                        |                        |                                                      |                        |                        |
| 13        | $-1.03 \times 10^{-16}$ | $-5.40 \times 10^{-16}$ | 100.00                 |                                                     |                        |                        |                                                      |                        |                        |
| 14        | $-1.65 \times 10^{-16}$ | $-8.68 \times 10^{-16}$ | 100.00                 |                                                     |                        |                        |                                                      |                        |                        |
| 15        | $-1.80 \times 10^{-16}$ | $-9.50 \times 10^{-16}$ | 100.00                 |                                                     |                        |                        |                                                      |                        |                        |
| 16        | $-2.54 \times 10^{-16}$ | $-1.34 \times 10^{-15}$ | 100.00                 |                                                     |                        |                        |                                                      |                        |                        |
| 17        | $-3.54 \times 10^{-16}$ | $-1.86 \times 10^{-15}$ | 100.00                 |                                                     |                        |                        |                                                      |                        |                        |
| 18        | $-4.13 \times 10^{-16}$ | $-2.17 \times 10^{-15}$ | 100.00                 |                                                     |                        |                        |                                                      |                        |                        |
| 19        | $-5.34 \times 10^{-16}$ | $-2.81 \times 10^{-15}$ | 100.00                 |                                                     |                        |                        |                                                      |                        |                        |
